# Supplementary material for: Ocena żywienia u chorych w podeszłym wieku w okresie okołooperacyjnym
Source: MDPI journal article supplement (doi:10.3390/antiox12030755), 2012-01-01

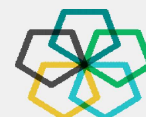

## Aromatic Plant Research Center

We provide uncompromising  
quality control for your products.

**Customer** : doTERRA International  
**Lot Number** : 2111313  
**Date Filled** : 04/23/2021

**Column** : ZB5 (60 m length × 0.25 mm inner diameter × 0.25 µm film thickness)  
**Instrument** : Shimadzu GCMS-QP2010 Ultra  
**Carrier gas** : Helium 80 psi  
**Temperature ramp** : 2 degrees celsius per minute up to 260-degrees celsius  
**Split ratio** : 30:1  
**Sample preparation** : 5%w/v solution with Dichloromethane.

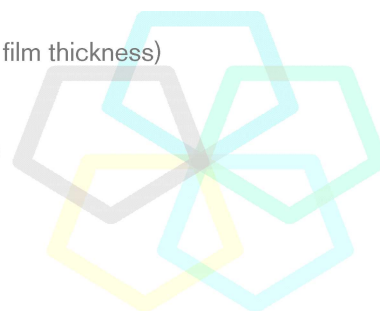

**Comments:**

The analysis of this Lemongrass lot revealed no contaminants or adulteration.  
The sample meets the expected chemical profile for authentic essential oils of *Cymbopogon flexuosus*.

**Analysied by** : Ambika Poudel  
**Reviewed by** : Dr. Prabodh Satyal

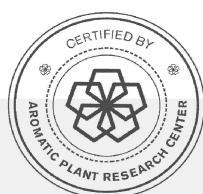

© Copyright 2021 Aromatic Plant Research Center. All rights reserved. Any publishing, copying, use, dissemination, or distribution of this report, including online, without the express written permission of Aromatic Plant Research Center is strictly prohibited.

# Lemongrass Essential Oil

Customer : doTERRA International

Lot Number : 2111313

Date Filled : 04/23/2021

## Chromatogram

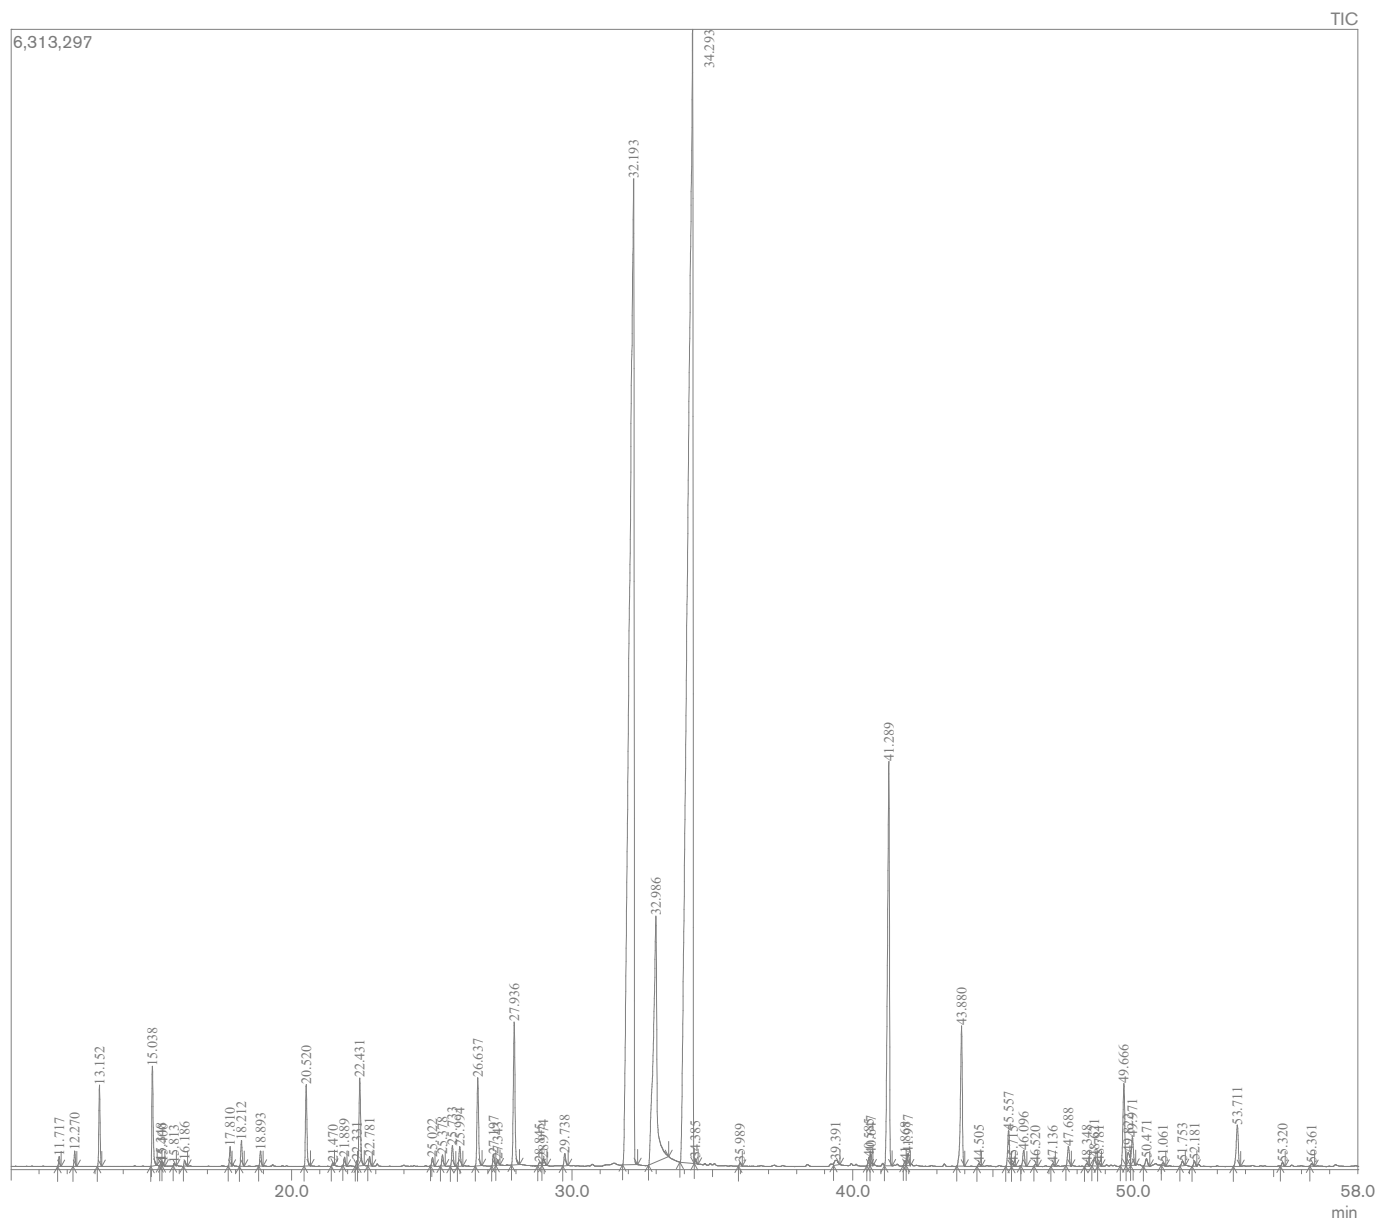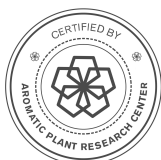

## Peak Report

| Peak# | R.Time | Name                           | Area%  |
|-------|--------|--------------------------------|--------|
| 1     | 11.717 | Tricyclene                     | 0.08   |
| 2     | 12.270 | alpha-Pinene                   | 0.12   |
| 3     | 13.152 | Camphene                       | 0.69   |
| 4     | 15.038 | 6-Methyl-5-hepten-2-one        | 0.90   |
| 5     | 15.348 | Myrcene                        | 0.04   |
| 6     | 15.400 | Dehydro-1,8-Cineole            | 0.03   |
| 7     | 15.813 | trans-Dehydroxy linalool oxide | 0.02   |
| 8     | 16.186 | n-Octanal                      | 0.06   |
| 9     | 17.810 | Limonene                       | 0.19   |
| 10    | 18.212 | cis-beta-Ocimene               | 0.25   |
| 11    | 18.893 | trans-beta-Ocimene             | 0.15   |
| 12    | 20.520 | 2-Nonanone                     | 0.82   |
| 13    | 21.470 | Terpinolene                    | 0.03   |
| 14    | 21.889 | Rosefuran                      | 0.09   |
| 15    | 22.331 | Perillene                      | 0.05   |
| 16    | 22.431 | Linalool                       | 0.98   |
| 17    | 22.781 | alpha-Pinene oxide             | 0.10   |
| 18    | 25.022 | Epiphotocitral A               | 0.09   |
| 19    | 25.378 | exo-Isocitral                  | 0.13   |
| 20    | 25.733 | trans-Chrysanthanal            | 0.23   |
| 21    | 25.994 | Citronellal                    | 0.22   |
| 22    | 26.637 | cis-Isocitral                  | 1.00   |
| 23    | 27.197 | Rosefuran epoxide              | 0.13   |
| 24    | 27.343 | Borneol                        | 0.06   |
| 25    | 27.936 | trans-Isocitral                | 1.68   |
| 26    | 28.845 | Oxy citral                     | 0.06   |
| 27    | 28.974 | alpha-Terpineol                | 0.10   |
| 28    | 29.738 | n-Decanal                      | 0.15   |
| 29    | 32.193 | Neral                          | 32.05  |
| 30    | 32.986 | Geraniol                       | 6.42   |
| 31    | 34.293 | Geranial                       | 41.27  |
| 32    | 34.385 | 4-Undecanone                   | 0.05   |
| 33    | 35.989 | Geranyl formate                | 0.04   |
| 34    | 39.391 | Neric acid                     | 0.11   |
| 35    | 40.585 | Cyclosativene                  | 0.10   |
| 36    | 40.647 | alpha-Ylangene                 | 0.13   |
| 37    | 41.289 | Geranyl acetate                | 5.51   |
| 38    | 41.868 | beta-Cubebene                  | 0.06   |
| 39    | 41.977 | beta-Elemene                   | 0.16   |
| 40    | 43.880 | beta-Caryophyllene             | 1.83   |
| 41    | 44.505 | beta-Copaene                   | 0.04   |
| 42    | 45.557 | trans-Isoeugenol               | 0.45   |
| 43    | 45.715 | trans-Muurola-3,5-diene        | 0.04   |
| 44    | 46.096 | alpha-Humulene                 | 0.20   |
| 45    | 46.520 | cis-Muurola-4(14),5-diene      | 0.03   |
| 46    | 47.136 | trans-Cadina-1(6),4-diene      | 0.03   |
| 47    | 47.688 | Germacrene D                   | 0.24   |
| 48    | 48.348 | trans-Muurola-4(14),5-diene    | 0.04   |
| 49    | 48.621 | epi-Cubebol                    | 0.14   |
| 50    | 48.781 | alpha-Murolene                 | 0.04   |
| 51    | 49.666 | gamma-Cadinene                 | 1.05   |
| 52    | 49.822 | Cubebol                        | 0.23   |
| 53    | 49.971 | delta-Cadinene                 | 0.39   |
| 54    | 50.471 | trans-gamma-Bisabolene         | 0.11   |
| 55    | 51.061 | alpha-Cadinene                 | 0.03   |
| 56    | 51.753 | alpha-Elemol                   | 0.06   |
| 57    | 52.181 | Geranyl butanoate              | 0.06   |
| 58    | 53.711 | Caryophyllene oxide            | 0.60   |
| 59    | 55.320 | Humulene epoxide II            | 0.05   |
| 60    | 56.361 | 1-epi-Cubenol                  | 0.03   |
|       |        |                                | 100.00 |

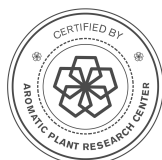

Supplement: s1 [file s1]
