# Supplementary material for: Ocena żywienia u chorych w podeszłym wieku w okresie okołooperacyjnym
Source: MDPI journal article supplement (doi:10.3390/antiox12030755), 2012-01-01

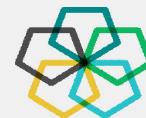

## Aromatic Plant Research Center

We provide uncompromising  
quality control for your products.

**Customer** : doTERRA International  
**Lot Number** : 211265  
**Date Filled** : 05/06/2021

**Column** : ZB5 (60 m length × 0.25 mm inner diameter × 0.25 µm film thickness)  
**Instrument** : Shimadzu GCMS-QP2010 Ultra  
**Carrier gas** : Helium 80 psi  
**Temperature ramp** : 2 degrees celsius per minute up to 260-degrees celsius  
**Split ratio** : 30:1  
**Sample preparation** : 5%w/v solution with Dichloromethane.

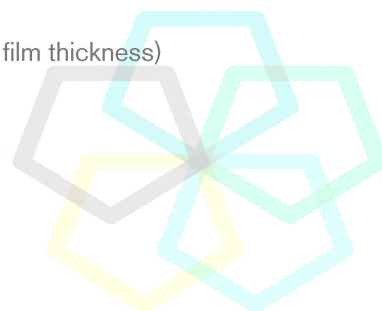

**Comments:**

The analysis of this Oregano lot revealed no contaminants or adulteration.  
The sample meets the expected chemical profile for authentic essential oils of *Origanum vulgare*.

**Analysied by** : Ambika Poudel  
**Reviewed by** : Dr. Prabodh Satyal

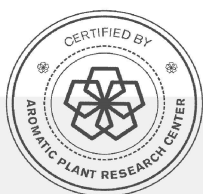

© Copyright 2021 Aromatic Plant Research Center. All rights reserved. Any publishing, copying, use, dissemination, or distribution of this report, including online, without the express written permission of Aromatic Plant Research Center is strictly prohibited.

# Oregano Essential Oil

Customer : doTERRA International

Lot Number : 211265

Date Filled : 05/06/2021

## Chromatogram

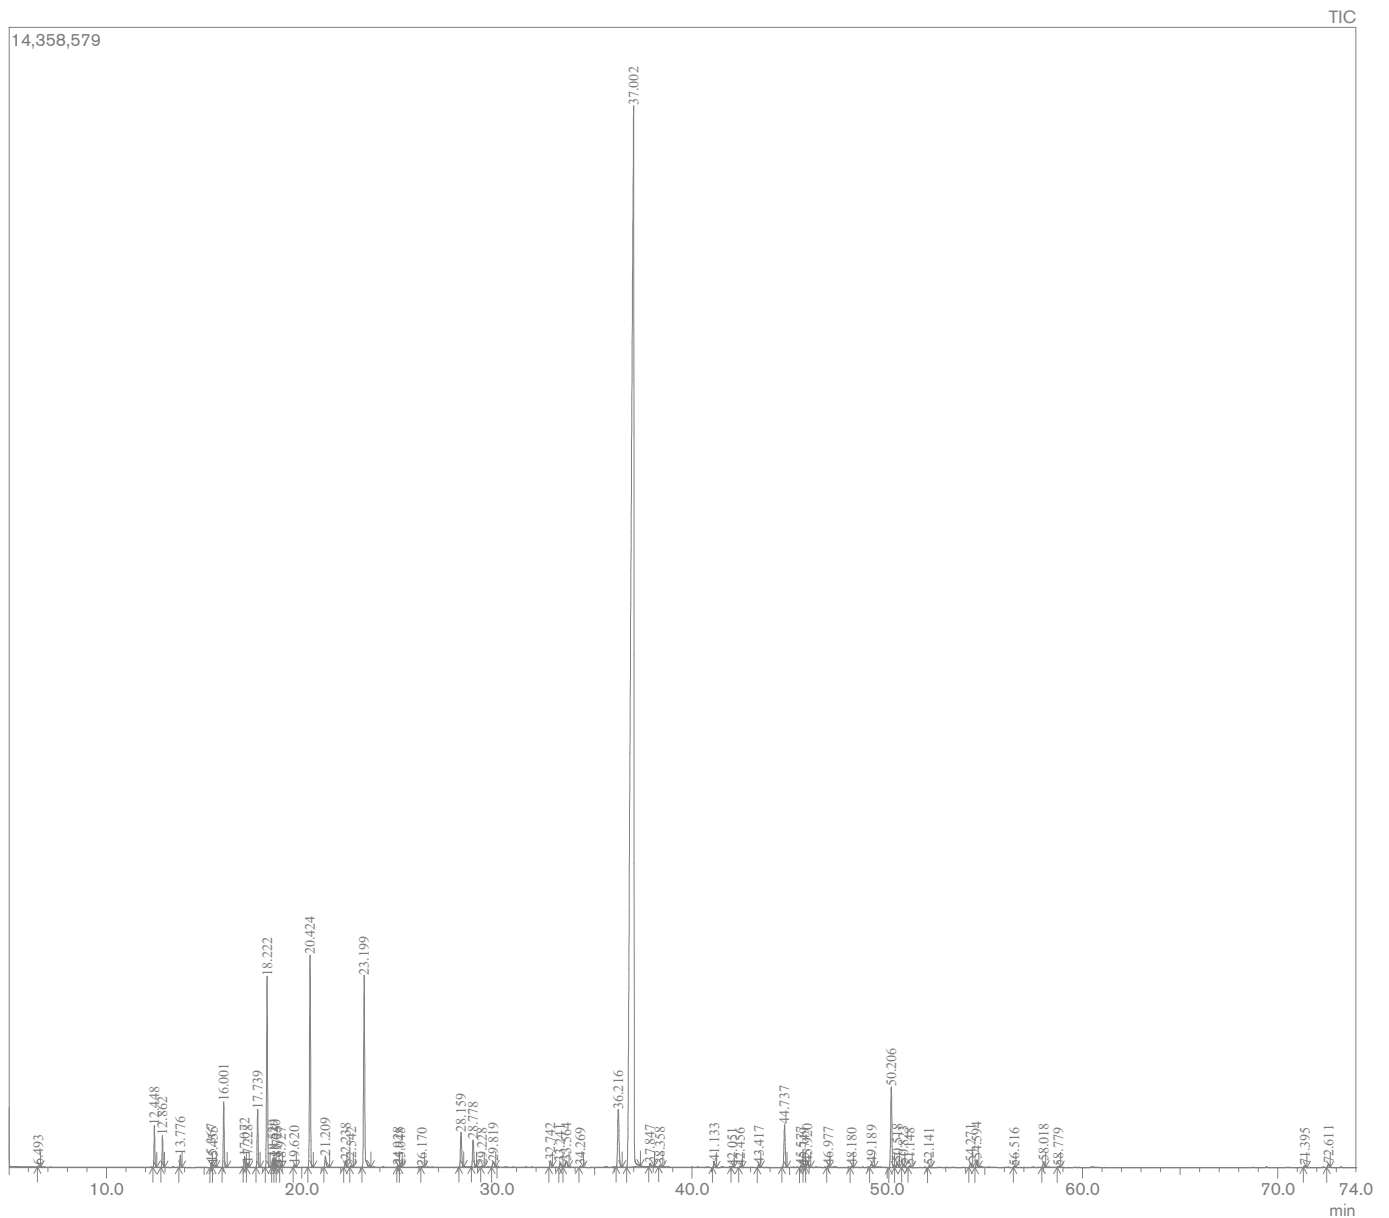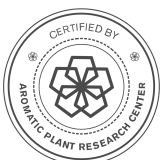

© Copyright 2021 Aromatic Plant Research Center. All rights reserved. Any publishing, copying, use, dissemination, or distribution of this report, including online, without the express written permission of Aromatic Plant Research Center is strictly prohibited.

## Peak Report

| Peak# | R.Time | Name                         | Area%  |
|-------|--------|------------------------------|--------|
| 1     | 6.493  | Methyl-alpha-methyl butyrate | 0.02   |
| 2     | 12.448 | alpha-Thujene                | 0.78   |
| 3     | 12.862 | alpha-Pinene                 | 0.60   |
| 4     | 13.776 | Camphene                     | 0.24   |
| 5     | 15.367 | beta-Pinene                  | 0.10   |
| 6     | 15.455 | 1-Octen-3-ol                 | 0.07   |
| 7     | 16.001 | Myrcene                      | 1.35   |
| 8     | 17.072 | alpha-Phellandrene           | 0.23   |
| 9     | 17.228 | delta-3-Carene               | 0.09   |
| 10    | 17.739 | alpha-Terpinene              | 1.27   |
| 11    | 18.222 | para-Cymene                  | 4.23   |
| 12    | 18.529 | Limonene                     | 0.20   |
| 13    | 18.630 | beta-Phellandrene            | 0.21   |
| 14    | 18.725 | 1,8-cineole                  | 0.06   |
| 15    | 18.927 | cis-beta-Ocimene             | 0.04   |
| 16    | 19.620 | trans-beta-Ocimene           | 0.07   |
| 17    | 20.424 | gamma-Terpinene              | 4.89   |
| 18    | 21.209 | cis-Sabinene hydrate         | 0.31   |
| 19    | 22.238 | Terpinolene                  | 0.16   |
| 20    | 22.542 | para-Cymenene                | 0.05   |
| 21    | 23.199 | Linalool                     | 4.91   |
| 22    | 24.928 | cis-para-Menth-2-en-1-ol     | 0.04   |
| 23    | 25.048 | alpha-Campholenal            | 0.04   |
| 24    | 26.170 | trans-para-Menth-2-en-1-ol   | 0.03   |
| 25    | 28.159 | Borneol                      | 0.96   |
| 26    | 28.778 | Terpinen-4-ol                | 0.78   |
| 27    | 29.228 | para-Cymen-8-ol              | 0.04   |
| 28    | 29.819 | alpha-Terpineol              | 0.18   |
| 29    | 32.742 | Methyl carvacrol ether       | 0.16   |
| 30    | 33.241 | Carvone                      | 0.13   |
| 31    | 33.564 | Linalyl acetate              | 0.24   |
| 32    | 34.269 | Carvenone                    | 0.04   |
| 33    | 36.216 | Thymol                       | 1.84   |
| 34    | 37.002 | Carvacrol                    | 70.30  |
| 35    | 37.847 | Methyl non-8-enoate          | 0.13   |
| 36    | 38.358 | tert-Butyl-para-benzoquinone | 0.05   |
| 37    | 41.133 | Carvacryl acetate            | 0.15   |
| 38    | 42.051 | Geranyl acetate              | 0.03   |
| 39    | 42.456 | beta-Bourbonene              | 0.03   |
| 40    | 43.417 | Methyleugenol                | 0.09   |
| 41    | 44.737 | beta-Caryophyllene           | 1.18   |
| 42    | 45.577 | trans-alpha-Bergamotene      | 0.06   |
| 43    | 45.749 | TertButylcatechol            | 0.03   |
| 44    | 45.920 | Aromadendrene                | 0.16   |
| 45    | 46.977 | alpha-Humulene               | 0.06   |
| 46    | 48.180 | trans-Cadina-1(6),4-diene    | 0.04   |
| 47    | 49.189 | Viridiflorene                | 0.11   |
| 48    | 50.206 | beta-Bisabolene              | 2.21   |
| 49    | 50.518 | gamma-Cadinene               | 0.15   |
| 50    | 50.823 | delta-Cadinene               | 0.10   |
| 51    | 51.148 | beta-Sesquiphellandrene      | 0.04   |
| 52    | 52.141 | trans-alpha-Bisabolene       | 0.04   |
| 53    | 54.271 | Spathulenol                  | 0.13   |
| 54    | 54.594 | Caryophyllene oxide          | 0.21   |
| 55    | 56.516 | 1,10-Di-epi-cubenol          | 0.02   |
| 56    | 58.018 | alpha-Murolol                | 0.16   |
| 57    | 58.779 | alpha-Cadinol                | 0.03   |
| 58    | 71.395 | Oregano Sesquiterpenoid 1    | 0.05   |
| 59    | 72.611 | Oregano Sesquiterpenoid 2    | 0.10   |
|       |        |                              | 100.00 |

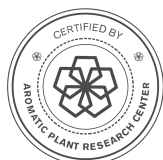

Supplement: s1 [file s1]
